# Supplementary material for: Using a continuum model to decipher the mechanics of embryonic tissue spreading from time-lapse image sequences: An approximate Bayesian computation approach
Source: PubMed Central journal article supplement (PMC6597152; doi:10.1371/journal.pone.0218021), 2019-06-27
Supplement: pone.0218021.s003.pdf [file pone.0218021.s003.pdf]

| Parameter |                                | $F/k$ (dimensionless) |             | $k/b$ ( $\mu\text{m}^2/\text{h}$ ) |             | $\alpha$ ( $\text{h}^{-1}$ ) |             | $\rho_{\text{unstressed}}$ ( $\text{cells}/\mu\text{m}^2$ ) |             |
|-----------|--------------------------------|-----------------------|-------------|------------------------------------|-------------|------------------------------|-------------|-------------------------------------------------------------|-------------|
| Explant   | Initial Area ( $\text{mm}^2$ ) | Lower Bound           | Upper Bound | Lower Bound                        | Upper Bound | Lower Bound                  | Upper Bound | Lower Bound                                                 | Upper Bound |
| 1         | 0.14                           | 0.4949                | 0.5060      | 1700                               | 1739        | 0.4678                       | 0.4793      | 1528                                                        | 1539        |
| 2         | 0.23                           | 0.5188                | 0.5299      | 1904                               | 1946        | 0.4514                       | 0.4629      | 1513                                                        | 1524        |
| 3         | 0.23                           | 0.4112                | 0.4223      | 1937                               | 1983        | 0.4376                       | 0.4491      | 1528                                                        | 1539        |
| 4         | 0.24                           | 0.4156                | 0.4269      | 2161                               | 2209        | 0.4244                       | 0.4358      | 1523                                                        | 1535        |
| 5         | 0.26                           | 0.4980                | 0.5091      | 1903                               | 1946        | 0.4585                       | 0.4699      | 1519                                                        | 1530        |
| 6         | 0.30                           | 0.4397                | 0.4517      | 2262                               | 2311        | 0.4470                       | 0.4584      | 1512                                                        | 1524        |
| 7         | 0.36                           | 0.5084                | 0.5195      | 2047                               | 2093        | 0.4504                       | 0.4618      | 1515                                                        | 1526        |
| 8         | 0.45                           | 0.5309                | 0.5425      | 2355                               | 2402        | 0.4419                       | 0.4532      | 1491                                                        | 1502        |
| 9         | 0.54                           | 0.6276                | 0.6391      | 2653                               | 2700        | 0.4658                       | 0.4772      | 1468                                                        | 1479        |
| 10        | 0.60                           | 0.6630                | 0.6741      | 2718                               | 2764        | 0.4697                       | 0.4811      | 1460                                                        | 1471        |
| 11        | 0.64                           | 0.5430                | 0.5549      | 2508                               | 2556        | 0.4497                       | 0.4610      | 1480                                                        | 1491        |
| 12        | 0.68                           | 0.6079                | 0.6197      | 2624                               | 2672        | 0.4545                       | 0.4659      | 1467                                                        | 1478        |
| 13        | 0.86                           | 0.5499                | 0.5621      | 2502                               | 2550        | 0.4423                       | 0.4538      | 1482                                                        | 1494        |
| 14        | 1.12                           | 0.4848                | 0.4965      | 2366                               | 2415        | 0.4357                       | 0.4470      | 1489                                                        | 1500        |
| 15        | 1.49                           | 0.4585                | 0.4704      | 2318                               | 2366        | 0.4397                       | 0.4510      | 1488                                                        | 1499        |
| 16        | 1.73                           | 0.5779                | 0.5898      | 2614                               | 2663        | 0.4550                       | 0.4663      | 1469                                                        | 1481        |
| 17        | 2.14                           | 0.5524                | 0.5649      | 2556                               | 2605        | 0.4419                       | 0.4532      | 1464                                                        | 1476        |
| 18        | 2.57                           | 0.7522                | 0.7621      | 2943                               | 2987        | 0.5011                       | 0.5122      | 1440                                                        | 1451        |
